# Supplementary material for: Beyond the metal–metal triple bond in binuclear cyclopentadienylchromium carbonyl chemistry
Source: Royal Society of Chemistry journal article supplement (doi:10.1039/b805383a), 2008-01-01
Supplement: b805383a.pdf [file b805383a.pdf]

# Beyond the Metal-Metal Triple Bond in Binuclear Cyclopentadienylchromium Carbonyl Chemistry

Xiuhui Zhang,<sup>a</sup> Qian-shu Li,<sup>\*a,b</sup> Yaoming Xie,<sup>c</sup>  
R. Bruce King,<sup>\*b,c</sup> and Henry F. Schaefer III<sup>c</sup>

<sup>a</sup>Institute of Chemical Physics, Beijing Institute of Technology, Beijing 100081, P. R. China

<sup>b</sup>School of Chemistry and Environment, South China Normal University, Guangzhou 510631, P. R. China

<sup>c</sup>Department of Chemistry and Center for Computational Chemistry, University of Georgia, Athens, Georgia 30602, USA

## Supporting Information

**Tables S1-S7.** The theoretical harmonic vibrational frequencies for the  $\text{Cp}_2\text{Cr}_2(\text{CO})_n$  ( $n = 3, 2$ ) structures using the BP86 method.

**Tables S8-S14.** The theoretical Cartesian coordinates for the  $\text{Cp}_2\text{Cr}_2(\text{CO})_n$  ( $n = 3, 2$ ) structures using the BP86 method.

Complete Gaussian03 reference (reference 32).

**Appendix.** Results from density functional theory studies (B3LYP and BP86) on  $(\eta^5\text{-Me}_5\text{C}_5)_2\text{Cr}_2(\text{CO})_n$  ( $n = 4, 3, 2$ ) derivatives (**Tables A1-A15** and **Figures A1-A7**).

**Table S1.** The theoretical harmonic vibrational frequencies (in  $\text{cm}^{-1}$ ) and their infrared intensities (in  $\text{km/mol}$ ) for the triplet  $\text{Cp}_2\text{Cr}_2(\text{CO})_3$  structure **3T-1** using the BP86 method.

|             |      |      |      |      |      |      |      |      |      |
|-------------|------|------|------|------|------|------|------|------|------|
| Frequencies | a    | a    | a    | a    | a    | a    | a    | a    | a    |
| IR          | 22   | 23   | 52   | 75   | 80   | 86   | 129  | 135  | 147  |
| Intensities | 0    | 0    | 1    | 2    | 0    | 0    | 0    | 0    | 2    |
| Frequencies | a    | a    | a    | a    | a    | a    | a    | a    | a    |
| IR          | 149  | 188  | 220  | 326  | 331  | 342  | 348  | 361  | 400  |
| Intensities | 0    | 1    | 2    | 5    | 5    | 1    | 4    | 1    | 0    |
| Frequencies | a    | a    | a    | a    | a    | a    | a    | a    | a    |
| IR          | 409  | 442  | 452  | 485  | 496  | 519  | 564  | 568  | 573  |
| Intensities | 9    | 5    | 4    | 3    | 1    | 6    | 77   | 15   | 1    |
| Frequencies | a    | a    | a    | a    | a    | a    | a    | a    | a    |
| IR          | 574  | 580  | 581  | 613  | 785  | 793  | 798  | 801  | 806  |
| Intensities | 7    | 6    | 1    | 11   | 52   | 34   | 43   | 4    | 23   |
| Frequencies | a    | a    | a    | a    | a    | a    | a    | a    | a    |
| IR          | 814  | 815  | 816  | 816  | 819  | 864  | 869  | 875  | 879  |
| Intensities | 0    | 0    | 5    | 1    | 3    | 1    | 0    | 2    | 1    |
| Frequencies | a    | a    | a    | a    | a    | a    | a    | a    | a    |
| IR          | 993  | 994  | 995  | 996  | 1041 | 1043 | 1043 | 1044 | 1107 |
| Intensities | 8    | 12   | 9    | 10   | 0    | 0    | 0    | 1    | 5    |
| Frequencies | a    | a    | a    | a    | a    | a    | a    | a    | a    |
| IR          | 1110 | 1224 | 1225 | 1358 | 1363 | 1367 | 1372 | 1409 | 1409 |
| Intensities | 3    | 0    | 0    | 0    | 0    | 1    | 2    | 2    | 4    |
| Frequencies | a    | a    | a    | a    | a    | a    | a    | a    | a    |
| IR          | 1410 | 1413 | 1796 | 1831 | 1872 | 3161 | 3163 | 3168 | 3169 |
| Intensities | 2    | 3    | 775  | 789  | 211  | 0    | 0    | 0    | 0    |
| Frequencies | a    | a    | a    | a    | a    | a    |      |      |      |
| IR          | 3173 | 3179 | 3181 | 3183 | 3188 | 3192 |      |      |      |
| Intensities | 0    | 0    | 0    | 0    | 0    | 0    |      |      |      |

**Table S2.** The theoretical harmonic vibrational frequencies (in  $\text{cm}^{-1}$ ) and their infrared intensities (in  $\text{km/mol}$ ) for the triplet  $\text{Cp}_2\text{Cr}_2(\text{CO})_3$  structure **3T-2** using the BP86 method.

|                |      |      |      |      |      |      |      |      |      |
|----------------|------|------|------|------|------|------|------|------|------|
|                | b    | a    | a    | b    | b    | a    | b    | a    | b    |
| Frequencies    | 24   | 32   | 63   | 65   | 69   | 95   | 104  | 128  | 138  |
| IR Intensities | 0    | 0    | 0    | 3    | 1    | 0    | 1    | 0    | 1    |
|                | a    | b    | a    | b    | b    | a    | a    | b    | b    |
| Frequencies    | 162  | 176  | 205  | 270  | 332  | 335  | 349  | 366  | 380  |
| IR Intensities | 1    | 0    | 0    | 5    | 3    | 1    | 6    | 0    | 0    |
|                | a    | b    | a    | a    | b    | b    | a    | a    | b    |
| Frequencies    | 416  | 424  | 445  | 479  | 490  | 523  | 530  | 551  | 560  |
| IR Intensities | 0    | 5    | 0    | 6    | 28   | 43   | 16   | 19   | 16   |
|                | a    | b    | b    | a    | b    | a    | b    | a    | b    |
| Frequencies    | 576  | 576  | 577  | 578  | 788  | 789  | 802  | 803  | 804  |
| IR Intensities | 0    | 2    | 1    | 0    | 70   | 0    | 59   | 3    | 6    |
|                | a    | a    | b    | a    | b    | b    | a    | a    | b    |
| Frequencies    | 805  | 815  | 815  | 816  | 817  | 864  | 864  | 874  | 875  |
| IR Intensities | 2    | 0    | 2    | 0    | 2    | 2    | 2    | 0    | 1    |
|                | b    | a    | b    | a    | a    | b    | a    | b    | a    |
| Frequencies    | 992  | 992  | 993  | 993  | 1040 | 1041 | 1042 | 1043 | 1106 |
| IR Intensities | 21   | 2    | 1    | 20   | 0    | 1    | 1    | 0    | 0    |
|                | b    | a    | b    | b    | a    | b    | a    | b    | a    |
| Frequencies    | 1106 | 1223 | 1223 | 1359 | 1359 | 1370 | 1370 | 1407 | 1407 |
| IR Intensities | 10   | 0    | 0    | 1    | 0    | 2    | 0    | 1    | 4    |
|                | b    | a    | a    | b    | a    | a    | b    | b    | a    |
| Frequencies    | 1411 | 1411 | 1785 | 1830 | 1861 | 3166 | 3166 | 3166 | 3167 |
| IR Intensities | 4    | 0    | 893  | 877  | 121  | 0    | 0    | 0    | 0    |
|                | b    | a    | b    | a    | b    | a    |      |      |      |
| Frequencies    | 3178 | 3178 | 3181 | 3181 | 3190 | 3190 |      |      |      |
| IR Intensities | 0    | 0    | 0    | 0    | 0    | 0    |      |      |      |

**Table S3.** The theoretical harmonic vibrational frequencies (in  $\text{cm}^{-1}$ ) and their infrared intensities (in  $\text{km/mol}$ ) for the singlet  $\text{Cp}_2\text{Cr}_2(\text{CO})_3$  structure **3S-1** using the BP86 method.

|                |      |      |      |      |      |      |      |      |      |
|----------------|------|------|------|------|------|------|------|------|------|
|                | a''  | a''  | a''  | a''  | a'   | a'   | a''  | a'   | a''  |
| Frequencies    | 30i  | 18   | 35   | 72   | 80   | 105  | 126  | 131  | 133  |
| IR Intensities |      | 0    | 0    | 3    | 1    | 1    | 0    | 0    | 0    |
|                | a'   | a'   | a'   | a''  | a''  | a'   | a'   | a'   | a''  |
| Frequencies    | 153  | 157  | 215  | 321  | 323  | 332  | 337  | 355  | 406  |
| IR Intensities | 0    | 2    | 0    | 8    | 2    | 0    | 4    | 1    | 4    |
|                | a'   | a''  | a''  | a'   | a'   | a'   | a''  | a'   | a''  |
| Frequencies    | 407  | 427  | 492  | 505  | 513  | 525  | 555  | 569  | 570  |
| IR Intensities | 0    | 5    | 0    | 39   | 7    | 0    | 17   | 2    | 1    |
|                | a'   | a''  | a'   | a'   | a'   | a'   | a''  | a'   | a'   |
| Frequencies    | 574  | 577  | 578  | 609  | 790  | 794  | 799  | 802  | 807  |
| IR Intensities | 3    | 0    | 0    | 16   | 63   | 60   | 0    | 20   | 19   |
|                | a''  | a''  | a'   | a'   | a''  | a''  | a''  | a'   | a'   |
| Frequencies    | 812  | 814  | 815  | 817  | 818  | 863  | 875  | 877  | 878  |
| IR Intensities | 0    | 2    | 2    | 5    | 2    | 0    | 0    | 2    | 1    |
|                | a'   | a''  | a'   | a''  | a'   | a''  | a''  | a'   | a'   |
| Frequencies    | 989  | 991  | 994  | 996  | 1039 | 1042 | 1043 | 1044 | 1101 |
| IR Intensities | 8    | 15   | 7    | 10   | 0    | 0    | 0    | 1    | 4    |
|                | a'   | a''  | a''  | a'   | a''  | a''  | a'   | a''  | a'   |
| Frequencies    | 1110 | 1223 | 1224 | 1342 | 1365 | 1367 | 1370 | 1406 | 1407 |
| IR Intensities | 3    | 0    | 0    | 2    | 0    | 1    | 1    | 1    | 3    |
|                | a'   | a''  | a''  | a'   | a'   | a'   | a''  | a'   | a''  |
| Frequencies    | 1410 | 1413 | 1833 | 1837 | 1870 | 3162 | 3164 | 3168 | 3169 |
| IR Intensities | 3    | 2    | 670  | 928  | 144  | 0    | 0    | 0    | 0    |
|                | a''  | a''  | a'   | a'   | a'   | a'   |      |      |      |
| Frequencies    | 3177 | 3181 | 3181 | 3184 | 3189 | 3192 |      |      |      |
| IR Intensities | 0    | 0    | 0    | 0    | 0    | 0    |      |      |      |

**Table S4.** The theoretical harmonic vibrational frequencies (in  $\text{cm}^{-1}$ ) and their infrared intensities (in  $\text{km/mol}$ ) for the triplet  $\text{Cp}_2\text{Cr}_2(\text{CO})_2$  structure **2T-1** using the BP86 method.

|                |      |      |      |      |      |      |      |      |      |
|----------------|------|------|------|------|------|------|------|------|------|
|                | a''  | a''  | a'   | a''  | a'   | a'   | a''  | a'   | a'   |
| Frequencies    | 6    | 27   | 37   | 66   | 80   | 87   | 103  | 142  | 167  |
| IR Intensities | 0    | 0    | 1    | 0    | 0    | 0    | 0    | 1    | 0    |
|                | a''  | a'   | a''  | a'   | a''  | a'   | a'   | a''  | a'   |
| Frequencies    | 176  | 281  | 300  | 312  | 330  | 339  | 381  | 397  | 463  |
| IR Intensities | 0    | 1    | 3    | 2    | 1    | 2    | 30   | 0    | 5    |
|                | a''  | a'   | a''  | a'   | a''  | a''  | a'   | a'   | a'   |
| Frequencies    | 479  | 493  | 554  | 563  | 573  | 576  | 576  | 583  | 762  |
| IR Intensities | 4    | 10   | 16   | 1    | 1    | 0    | 4    | 7    | 4    |
|                | a'   | a'   | a''  | a'   | a''  | a''  | a'   | a'   | a''  |
| Frequencies    | 768  | 773  | 779  | 781  | 793  | 813  | 813  | 815  | 816  |
| IR Intensities | 41   | 88   | 1    | 53   | 5    | 1    | 0    | 0    | 0    |
|                | a''  | a''  | a'   | a'   | a''  | a''  | a'   | a'   | a'   |
| Frequencies    | 849  | 851  | 857  | 861  | 985  | 990  | 994  | 996  | 1038 |
| IR Intensities | 0    | 1    | 2    | 1    | 6    | 15   | 8    | 20   | 1    |
|                | a''  | a''  | a'   | a'   | a'   | a''  | a''  | a''  | a'   |
| Frequencies    | 1040 | 1040 | 1041 | 1104 | 1106 | 1221 | 1224 | 1353 | 1355 |
| IR Intensities | 0    | 0    | 0    | 6    | 3    | 0    | 0    | 1    | 2    |
|                | a''  | a'   | a''  | a''  | a'   | a'   | a''  | a'   | a'   |
| Frequencies    | 1358 | 1363 | 1401 | 1407 | 1414 | 1415 | 1805 | 1838 | 3159 |
| IR Intensities | 0    | 1    | 3    | 3    | 1    | 2    | 998  | 257  | 0    |
|                | a''  | a'   | a''  | a'   | a''  | a'   | a''  | a'   | a'   |
| Frequencies    | 3161 | 3163 | 3165 | 3174 | 3174 | 3177 | 3180 | 3186 | 3189 |
| IR Intensities | 0    | 0    | 0    | 0    | 0    | 1    | 1    | 0    | 0    |

**Table S5.** The theoretical harmonic vibrational frequencies (in  $\text{cm}^{-1}$ ) and their infrared intensities (in  $\text{km/mol}$ ) for the quintet  $\text{Cp}_2\text{Cr}_2(\text{CO})_2$  structure **2Q-1** using the BP86 method

|                |      |      |      |      |      |      |      |      |      |
|----------------|------|------|------|------|------|------|------|------|------|
|                | a''  | a''  | a'   | a''  | a'   | a'   | a''  | a'   | a''  |
| Frequencies    | 17i  | 10   | 45   | 59   | 70   | 100  | 120  | 148  | 167  |
| IR Intensities |      | 0    | 1    | 0    | 2    | 0    | 0    | 2    | 0    |
|                | a'   | a'   | a''  | a''  | a'   | a'   | a''  | a'   | a'   |
| Frequencies    | 175  | 304  | 304  | 325  | 334  | 345  | 402  | 406  | 474  |
| IR Intensities | 0    | 3    | 3    | 2    | 6    | 4    | 0    | 18   | 10   |
|                | a''  | a'   | a'   | a''  | a''  | a'   | a''  | a'   | a'   |
| Frequencies    | 496  | 507  | 567  | 567  | 571  | 577  | 578  | 596  | 768  |
| IR Intensities | 6    | 16   | 1    | 7    | 8    | 2    | 0    | 4    | 25   |
|                | a'   | a'   | a''  | a'   | a''  | a'   | a''  | a'   | a''  |
| Frequencies    | 769  | 772  | 778  | 780  | 790  | 812  | 813  | 814  | 816  |
| IR Intensities | 0    | 90   | 2    | 47   | 2    | 6    | 0    | 2    | 1    |
|                | a''  | a''  | a'   | a'   | a'   | a''  | a''  | a'   | a'   |
| Frequencies    | 852  | 858  | 859  | 866  | 990  | 991  | 991  | 995  | 1038 |
| IR Intensities | 1    | 2    | 1    | 4    | 17   | 4    | 18   | 16   | 0    |
|                | a'   | a''  | a''  | a'   | a'   | a''  | a''  | a''  | a'   |
| Frequencies    | 1040 | 1040 | 1042 | 1104 | 1106 | 1222 | 1224 | 1353 | 1355 |
| IR Intensities | 0    | 0    | 0    | 7    | 3    | 0    | 0    | 0    | 1    |
|                | a'   | a''  | a''  | a'   | a''  | a'   | a''  | a'   | a''  |
| Frequencies    | 1362 | 1363 | 1404 | 1407 | 1408 | 1411 | 1797 | 1833 | 3158 |
| IR Intensities | 1    | 0    | 2    | 2    | 3    | 2    | 865  | 283  | 0    |
|                | a''  | a'   | a'   | a'   | a''  | a'   | a''  | a'   | a'   |
| Frequencies    | 3159 | 3162 | 3165 | 3174 | 3175 | 3175 | 3178 | 3186 | 3189 |
| IR Intensities | 0    | 0    | 1    | 0    | 0    | 0    | 1    | 0    | 0    |

**Table S6.** The theoretical harmonic vibrational frequencies (in  $\text{cm}^{-1}$ ) and their infrared intensities (in  $\text{km/mol}$ ) for the septet  $\text{Cp}_2\text{Cr}_2(\text{CO})_2$  **2H-1** using the BP86 method

|             |      |      |      |      |      |      |      |      |      |
|-------------|------|------|------|------|------|------|------|------|------|
| Frequencies | a''  | a''  | a''  | a'   | a''  | a'   | a'   | a'   | a''  |
| IR          | 44i  | 26i  | 22   | 24   | 67   | 74   | 120  | 143  | 153  |
| Intensities |      |      | 5    | 1    | 3    | 1    | 0    | 0    | 0    |
| Frequencies | a'   | a''  | a'   | a''  | a'   | a'   | a''  | a'   | a''  |
| IR          | 154  | 266  | 292  | 312  | 342  | 352  | 371  | 380  | 435  |
| Intensities | 1    | 4    | 1    | 1    | 25   | 2    | 5    | 24   | 14   |
| Frequencies | a'   | a'   | a''  | a'   | a''  | a''  | a'   | a'   | a''  |
| IR          | 440  | 483  | 553  | 556  | 563  | 570  | 572  | 583  | 752  |
| Intensities | 5    | 10   | 54   | 26   | 0    | 1    | 0    | 60   | 8    |
| Frequencies | a'   | a'   | a'   | a''  | a'   | a''  | a''  | a'   | a'   |
| IR          | 766  | 778  | 781  | 790  | 791  | 805  | 809  | 814  | 816  |
| Intensities | 106  | 1    | 15   | 0    | 21   | 6    | 0    | 15   | 2    |
| Frequencies | a'   | a''  | a''  | a'   | a'   | a''  | a'   | a''  | a''  |
| IR          | 849  | 849  | 852  | 863  | 985  | 987  | 988  | 996  | 1036 |
| Intensities | 0    | 3    | 0    | 0    | 17   | 11   | 16   | 11   | 0    |
| Frequencies | a'   | a'   | a''  | a'   | a'   | a''  | a''  | a''  | a'   |
| IR          | 1037 | 1039 | 1040 | 1100 | 1105 | 1221 | 1223 | 1347 | 1354 |
| Intensities | 2    | 1    | 0    | 12   | 4    | 0    | 0    | 0    | 10   |
| Frequencies | a'   | a''  | a'   | a''  | a'   | a''  | a''  | a'   | a'   |
| IR          | 1355 | 1363 | 1402 | 1402 | 1404 | 1417 | 1723 | 1791 | 3156 |
| Intensities | 1    | 11   | 2    | 3    | 2    | 2    | 2028 | 0    | 0    |
| Frequencies | a''  | a'   | a''  | a'   | a'   | a''  | a''  | a'   | a'   |
| IR          | 3156 | 3158 | 3162 | 3168 | 3174 | 3175 | 3180 | 3184 | 3188 |
| Intensities | 0    | 0    | 2    | 1    | 1    | 0    | 0    | 0    | 0    |

**Table S7.** The theoretical harmonic vibrational frequencies (in  $\text{cm}^{-1}$ ) and their infrared intensities (in  $\text{km/mol}$ ) for the singlet  $\text{Cp}_2\text{Cr}_2(\text{CO})_2$  structure **2S-1** using the BP86 method.

|                |      |      |      |      |      |      |      |      |      |
|----------------|------|------|------|------|------|------|------|------|------|
|                | a    | a    | a    | a    | a    | a    | a    | a    | a    |
| Frequencies    | 37   | 39   | 40   | 57   | 96   | 111  | 119  | 139  | 197  |
| IR Intensities | 0    | 0    | 0    | 1    | 1    | 0    | 0    | 1    | 1    |
|                | a    | a    | a    | a    | a    | a    | a    | a    | a    |
| Frequencies    | 224  | 298  | 302  | 320  | 332  | 352  | 374  | 413  | 449  |
| IR Intensities | 0    | 2    | 1    | 2    | 4    | 1    | 2    | 1    | 3    |
|                | a    | a    | a    | a    | a    | a    | a    | a    | a    |
| Frequencies    | 493  | 528  | 550  | 561  | 568  | 571  | 576  | 580  | 757  |
| IR Intensities | 7    | 4    | 4    | 7    | 4    | 4    | 4    | 4    | 4    |
|                | a    | a    | a    | a    | a    | a    | a    | a    | a    |
| Frequencies    | 764  | 772  | 776  | 789  | 795  | 810  | 812  | 814  | 815  |
| IR Intensities | 31   | 55   | 62   | 6    | 1    | 1    | 1    | 0    | 1    |
|                | a    | a    | a    | a    | a    | a    | a    | a    | a    |
| Frequencies    | 842  | 848  | 862  | 868  | 982  | 983  | 994  | 995  | 1035 |
| IR Intensities | 2    | 3    | 1    | 0    | 11   | 9    | 4    | 21   | 1    |
|                | a    | a    | a    | a    | a    | a    | a    | a    | a    |
| Frequencies    | 1038 | 1040 | 1042 | 1101 | 1102 | 1219 | 1221 | 1352 | 1353 |
| IR Intensities | 1    | 0    | 1    | 5    | 6    | 0    | 0    | 4    | 1    |
|                | a    | a    | a    | a    | a    | a    | a    | a    | a    |
| Frequencies    | 1353 | 1357 | 1397 | 1400 | 1418 | 1419 | 1802 | 1817 | 3150 |
| IR Intensities | 0    | 0    | 3    | 3    | 1    | 1    | 1039 | 206  | 0    |
|                | a    | a    | a    | a    | a    | a    | a    | a    | a    |
| Frequencies    | 3156 | 3158 | 3169 | 3173 | 3175 | 3179 | 3182 | 3187 | 3193 |
| IR Intensities | 0    | 0    | 0    | 1    | 0    | 0    | 0    | 0    | 1    |



**Table S8** The theoretical Cartesian coordinates (in Å) for the triplet Cp<sub>2</sub>Cr<sub>2</sub>(CO)<sub>3</sub> structure **3T-1** using the BP86 method

Standard orientation:

| Center Number | atomic Number | atomic type | Coordinates (angstroms) |           |           |
|---------------|---------------|-------------|-------------------------|-----------|-----------|
|               |               |             | X                       | Y         | Z         |
| 1             | 24            | 0           | -1.181695               | 0.060582  | -0.005251 |
| 2             | 24            | 0           | 1.109634                | -0.077332 | 0.000056  |
| 3             | 6             | 0           | 3.015164                | -0.225899 | 1.135274  |
| 4             | 6             | 0           | 2.813869                | 1.141342  | 0.753619  |
| 5             | 6             | 0           | 2.793199                | 1.202706  | -0.682489 |
| 6             | 1             | 0           | 3.068104                | -0.605325 | 2.159144  |
| 7             | 1             | 0           | 2.662645                | 1.985559  | 1.431023  |
| 8             | 1             | 0           | 2.623967                | 2.102648  | -1.278790 |
| 9             | 6             | 0           | -3.022586               | 0.253452  | 1.208124  |
| 10            | 6             | 0           | -3.022854               | 1.278668  | 0.198455  |
| 11            | 1             | 0           | -2.967671               | 0.415728  | 2.288555  |
| 12            | 1             | 0           | -2.994148               | 2.357534  | 0.370740  |
| 13            | 6             | 0           | -0.069281               | 1.636439  | -0.017078 |
| 14            | 8             | 0           | 0.092625                | 2.827981  | -0.026882 |
| 15            | 6             | 0           | 0.345145                | -1.051945 | 1.365835  |
| 16            | 8             | 0           | 0.033870                | -1.730034 | 2.298888  |
| 17            | 6             | 0           | 3.114765                | -1.017871 | -0.061733 |
| 18            | 6             | 0           | 2.980821                | -0.125888 | -1.185973 |
| 19            | 1             | 0           | 3.262342                | -2.099540 | -0.109609 |
| 20            | 1             | 0           | 3.007814                | -0.416107 | -2.239509 |
| 21            | 6             | 0           | -3.042076               | -1.024932 | 0.548987  |
| 22            | 6             | 0           | -3.066715               | -0.790449 | -0.867335 |
| 23            | 1             | 0           | -3.008714               | -2.002115 | 1.038814  |
| 24            | 1             | 0           | -3.038677               | -1.559478 | -1.644638 |
| 25            | 6             | 0           | 0.346875                | -1.100268 | -1.328583 |
| 26            | 8             | 0           | 0.043272                | -1.813141 | -2.238385 |
| 27            | 6             | 0           | -3.055950               | 0.627295  | -1.084396 |
| 28            | 1             | 0           | -3.026587               | 1.128736  | -2.056244 |

**Table S9** The theoretical Cartesian coordinates (in Å) for the triplet  $\text{Cp}_2\text{Cr}_2(\text{CO})_3$  structure **3T-2** using the BP86 method

Standard orientation:

| Center<br>Number | Atomic<br>Number | Atomic<br>Type | Coordinates (angstroms) |           |           |
|------------------|------------------|----------------|-------------------------|-----------|-----------|
|                  |                  |                | X                       | Y         | Z         |
| 1                | 24               | 0              | -0.000000               | 1.135579  | -0.020228 |
| 2                | 24               | 0              | -0.000000               | -1.135579 | -0.020228 |
| 3                | 6                | 0              | 0.945924                | -2.815562 | 1.088870  |
| 4                | 6                | 0              | 1.432295                | -2.784093 | -0.260746 |
| 5                | 6                | 0              | 0.314020                | -2.985412 | -1.146889 |
| 6                | 6                | 0              | -0.864844               | -3.149906 | -0.331491 |
| 7                | 6                | 0              | -0.472239               | -3.042193 | 1.043420  |
| 8                | 1                | 0              | 1.537785                | -2.658444 | 1.994096  |
| 9                | 1                | 0              | 2.464603                | -2.594440 | -0.567255 |
| 10               | 1                | 0              | 0.348245                | -3.008836 | -2.239283 |
| 11               | 1                | 0              | -1.881382               | -3.309467 | -0.700319 |
| 12               | 1                | 0              | -1.140250               | -3.071745 | 1.908734  |
| 13               | 6                | 0              | 0.472239                | 3.042193  | 1.043420  |
| 14               | 6                | 0              | -0.945924               | 2.815562  | 1.088870  |
| 15               | 6                | 0              | -1.432295               | 2.784093  | -0.260746 |
| 16               | 6                | 0              | -0.314020               | 2.985412  | -1.146889 |
| 17               | 6                | 0              | 0.864844                | 3.149906  | -0.331491 |
| 18               | 1                | 0              | 1.140250                | 3.071745  | 1.908734  |
| 19               | 1                | 0              | -1.537785               | 2.658444  | 1.994096  |
| 20               | 1                | 0              | -2.464603               | 2.594440  | -0.567255 |
| 21               | 1                | 0              | -0.348245               | 3.008836  | -2.239283 |
| 22               | 1                | 0              | 1.881382                | 3.309467  | -0.700319 |
| 23               | 6                | 0              | 1.430117                | 0.389419  | -0.944087 |
| 24               | 8                | 0              | 2.410412                | 0.159570  | -1.586719 |
| 25               | 6                | 0              | -1.430117               | -0.389419 | -0.944087 |
| 26               | 8                | 0              | -2.410412               | -0.159570 | -1.586719 |
| 27               | 6                | 0              | 0.000000                | -0.000000 | 1.611049  |
| 28               | 8                | 0              | 0.000000                | -0.000000 | 2.813912  |

**Table S10** The theoretical Cartesian coordinates (in Å) for the singlet  $\text{Cp}_2\text{Cr}_2(\text{CO})_3$  structure **3S-1** using the BP86 method

Standard orientation:

| Center number | atomic number | atomic type | Coordinates (angstroms) |           |           |
|---------------|---------------|-------------|-------------------------|-----------|-----------|
|               |               |             | X                       | Y         | Z         |
| 1             | 24            | 0           | -0.076586               | -1.075658 | 0.000000  |
| 2             | 24            | 0           | 0.169598                | 1.101756  | 0.000000  |
| 3             | 6             | 0           | 1.026484                | 2.974927  | 0.726072  |
| 4             | 6             | 0           | -0.344078               | 2.933873  | 1.159400  |
| 5             | 6             | 0           | -1.187763               | 2.897844  | 0.000000  |
| 6             | 1             | 0           | 1.911508                | 3.023653  | 1.365353  |
| 7             | 1             | 0           | -0.690485               | 2.868803  | 2.195303  |
| 8             | 1             | 0           | -2.277692               | 2.812323  | 0.000000  |
| 9             | 6             | 0           | 1.187800                | -2.744184 | 0.719470  |
| 10            | 6             | 0           | -0.992897               | -3.130718 | 0.000000  |
| 11            | 6             | 0           | -0.156182               | -2.982520 | 1.160185  |
| 12            | 1             | 0           | 2.055008                | -2.557644 | 1.357926  |
| 13            | 1             | 0           | -2.071994               | -3.302956 | 0.000000  |
| 14            | 1             | 0           | -0.494552               | -3.019385 | 2.199260  |
| 15            | 6             | 0           | -1.162752               | -0.264560 | 1.260140  |
| 16            | 8             | 0           | -1.949785               | 0.034640  | 2.108628  |
| 17            | 6             | 0           | 1.781568                | 0.247684  | 0.000000  |
| 18            | 8             | 0           | 2.941285                | -0.052513 | 0.000000  |
| 19            | 6             | 0           | 1.026484                | 2.974927  | -0.726072 |
| 20            | 6             | 0           | -0.344078               | 2.933873  | -1.159400 |
| 21            | 1             | 0           | 1.911508                | 3.023653  | -1.365353 |
| 22            | 1             | 0           | -0.690485               | 2.868803  | -2.195303 |
| 23            | 6             | 0           | 1.187800                | -2.744184 | -0.719470 |
| 24            | 6             | 0           | -0.156182               | -2.982520 | -1.160185 |
| 25            | 1             | 0           | 2.055008                | -2.557644 | -1.357926 |
| 26            | 1             | 0           | -0.494552               | -3.019385 | -2.199260 |
| 27            | 6             | 0           | -1.162752               | -0.264560 | -1.260140 |
| 28            | 8             | 0           | -1.949785               | 0.034640  | -2.108628 |

**Table S11** The theoretical Cartesian coordinates (in Å) for the triplet  $\text{Cp}_2\text{Cr}_2(\text{CO})_2$  structure **2T-1** using the BP86 method

Standard orientation:

| Center<br>Number | atomic<br>number | atomic<br>type | Coordinates (angstroms) |           |           |
|------------------|------------------|----------------|-------------------------|-----------|-----------|
|                  |                  |                | X                       | Y         | Z         |
| 1                | 24               | 0              | -0.127017               | 1.143674  | 0.000000  |
| 2                | 24               | 0              | -0.210361               | -1.165604 | -0.000000 |
| 3                | 6                | 0              | 0.292977                | -3.007432 | 1.161962  |
| 4                | 6                | 0              | 1.512575                | -2.376890 | 0.716223  |
| 5                | 1                | 0              | -0.005813               | -3.161966 | 2.201878  |
| 6                | 1                | 0              | 2.288142                | -1.956894 | 1.362127  |
| 7                | 6                | 0              | 1.442406                | 2.587893  | 0.718441  |
| 8                | 6                | 0              | 0.174212                | 3.107350  | 1.159745  |
| 9                | 1                | 0              | 2.256857                | 2.246079  | 1.363308  |
| 10               | 1                | 0              | -0.148581               | 3.207681  | 2.200071  |
| 11               | 6                | 0              | -0.907146               | -0.320428 | 1.518568  |
| 12               | 8                | 0              | -1.344484               | -0.007518 | 2.590129  |
| 13               | 6                | 0              | 0.292977                | -3.007432 | -1.161962 |
| 14               | 6                | 0              | 1.512575                | -2.376890 | -0.716223 |
| 15               | 1                | 0              | -0.005813               | -3.161966 | -2.201878 |
| 16               | 1                | 0              | 2.288142                | -1.956894 | -1.362127 |
| 17               | 6                | 0              | 1.442406                | 2.587893  | -0.718441 |
| 18               | 6                | 0              | 0.174212                | 3.107350  | -1.159745 |
| 19               | 1                | 0              | 2.256857                | 2.246079  | -1.363308 |
| 20               | 1                | 0              | -0.148581               | 3.207681  | -2.200071 |
| 21               | 6                | 0              | -0.907146               | -0.320428 | -1.518568 |
| 22               | 8                | 0              | -1.344484               | -0.007518 | -2.590129 |
| 23               | 6                | 0              | -0.601892               | 3.434629  | 0.000000  |
| 24               | 1                | 0              | -1.622895               | 3.827254  | 0.000000  |
| 25               | 6                | 0              | -0.447912               | -3.409254 | -0.000000 |
| 26               | 1                | 0              | -1.430973               | -3.888608 | -0.000000 |

**Table S12** The theoretical Cartesian coordinates (in Å) for the quintet Cp<sub>2</sub>Cr<sub>2</sub>(CO)<sub>2</sub> structure **2Q-1** using the BP86 method

Standard orientation:

| Center Number | Atomic number | Atomic Type | Coordinates (angstroms) |           |           |
|---------------|---------------|-------------|-------------------------|-----------|-----------|
|               |               |             | X                       | Y         | Z         |
| 1             | 24            | 0           | 0.117462                | 1.196833  | 0.000000  |
| 2             | 24            | 0           | 0.113774                | -1.156493 | -0.000000 |
| 3             | 6             | 0           | 0.030034                | -3.052170 | 1.161142  |
| 4             | 6             | 0           | 1.378381                | -2.818459 | 0.719593  |
| 5             | 1             | 0           | -0.304803               | -3.099093 | 2.200712  |
| 6             | 1             | 0           | 2.243732                | -2.649112 | 1.366918  |
| 7             | 6             | 0           | 1.316448                | 2.961184  | 0.719018  |
| 8             | 6             | 0           | -0.038776               | 3.156496  | 1.160444  |
| 9             | 1             | 0           | 2.188976                | 2.823030  | 1.364151  |
| 10            | 1             | 0           | -0.378607               | 3.167905  | 2.200051  |
| 11            | 6             | 0           | -0.764172               | -0.343959 | 1.403079  |
| 12            | 8             | 0           | -1.387116               | -0.051709 | 2.387965  |
| 13            | 6             | 0           | 0.030034                | -3.052170 | -1.161142 |
| 14            | 6             | 0           | 1.378381                | -2.818459 | -0.719593 |
| 15            | 1             | 0           | -0.304803               | -3.099093 | -2.200712 |
| 16            | 1             | 0           | 2.243732                | -2.649112 | -1.366918 |
| 17            | 6             | 0           | 1.316448                | 2.961184  | -0.719018 |
| 18            | 6             | 0           | -0.038776               | 3.156496  | -1.160444 |
| 19            | 1             | 0           | 2.188976                | 2.823030  | -1.364151 |
| 20            | 1             | 0           | -0.378607               | 3.167905  | -2.200051 |
| 21            | 6             | 0           | -0.764172               | -0.343959 | -1.403079 |
| 22            | 8             | 0           | -1.387116               | -0.051709 | -2.387965 |
| 23            | 6             | 0           | -0.873414               | 3.283301  | 0.000000  |
| 24            | 1             | 0           | -1.959638               | 3.411853  | 0.000000  |
| 25            | 6             | 0           | -0.805396               | -3.200593 | -0.000000 |
| 26            | 1             | 0           | -1.884879               | -3.371473 | -0.000000 |

**Table S13** The theoretical Cartesian coordinates (in Å) for the septet Cp<sub>2</sub>Cr<sub>2</sub>(CO)<sub>2</sub> structure **2H-1** using the BP86 method

Standard orientation:

| Center Number | atomic number | atomic type | Coordinates (angstroms) |           |           |
|---------------|---------------|-------------|-------------------------|-----------|-----------|
|               |               |             | X                       | Y         | Z         |
| 1             | 24            | 0           | -0.001101               | 1.301315  | -0.000000 |
| 2             | 24            | 0           | -0.005282               | -1.314145 | 0.000000  |
| 3             | 6             | 0           | -0.387817               | -3.143947 | 1.164751  |
| 4             | 6             | 0           | 0.984713                | -3.099264 | 0.721711  |
| 5             | 1             | 0           | -0.727913               | -3.140736 | 2.203208  |
| 6             | 1             | 0           | 1.864866                | -3.065144 | 1.369775  |
| 7             | 6             | 0           | 0.965019                | 3.249187  | 0.722937  |
| 8             | 6             | 0           | -0.394303               | 3.253129  | 1.167337  |
| 9             | 1             | 0           | 1.851570                | 3.243114  | 1.364340  |
| 10            | 1             | 0           | -0.732133               | 3.224593  | 2.206903  |
| 11            | 6             | 0           | 0.020835                | -0.320763 | 1.586673  |
| 12            | 8             | 0           | 0.049895                | 0.011049  | 2.744090  |
| 13            | 6             | 0           | -0.387817               | -3.143947 | -1.164751 |
| 14            | 6             | 0           | 0.984713                | -3.099264 | -0.721711 |
| 15            | 1             | 0           | -0.727913               | -3.140736 | -2.203208 |
| 16            | 1             | 0           | 1.864866                | -3.065144 | -1.369775 |
| 17            | 6             | 0           | 0.965019                | 3.249187  | -0.722937 |
| 18            | 6             | 0           | -0.394303               | 3.253129  | -1.167337 |
| 19            | 1             | 0           | 1.851570                | 3.243114  | -1.364340 |
| 20            | 1             | 0           | -0.732133               | 3.224593  | -2.206903 |
| 21            | 6             | 0           | 0.020835                | -0.320763 | -1.586673 |
| 22            | 8             | 0           | 0.049895                | 0.011049  | -2.744090 |
| 23            | 6             | 0           | -1.236342               | 3.217120  | -0.000000 |
| 24            | 1             | 0           | -2.330677               | 3.194475  | -0.000000 |
| 25            | 6             | 0           | -1.225206               | -3.167548 | 0.000000  |
| 26            | 1             | 0           | -2.319317               | -3.144544 | 0.000000  |

**Table S14** The theoretical Cartesian coordinates (in Å) for the septet Cp<sub>2</sub>Cr<sub>2</sub>(CO)<sub>2</sub> structure **2S-1** using the BP86 method

Standard orientation:

| Center<br>Number | atomic<br>Number | atomic<br>Type | Coordinates (angstroms) |           |           |
|------------------|------------------|----------------|-------------------------|-----------|-----------|
|                  |                  |                | X                       | Y         | Z         |
| 1                | 24               | 0              | -0.985678               | 0.076685  | -0.215322 |
| 2                | 24               | 0              | 1.100418                | 0.026417  | -0.415801 |
| 3                | 6                | 0              | 3.302007                | 0.595977  | -0.084102 |
| 4                | 6                | 0              | 3.179870                | -0.820554 | -0.002025 |
| 5                | 6                | 0              | 2.234881                | -1.117129 | 1.051249  |
| 6                | 6                | 0              | 1.802999                | 0.129638  | 1.634572  |
| 7                | 6                | 0              | 2.449110                | 1.195094  | 0.907541  |
| 8                | 1                | 0              | 3.885911                | 1.145347  | -0.830412 |
| 9                | 1                | 0              | 3.667049                | -1.554992 | -0.648530 |
| 10               | 1                | 0              | 1.929915                | -2.117614 | 1.368234  |
| 11               | 1                | 0              | 1.132981                | 0.246754  | 2.488426  |
| 12               | 1                | 0              | 2.320612                | 2.266663  | 1.080912  |
| 13               | 6                | 0              | -3.215828               | -0.548635 | -0.408143 |
| 14               | 6                | 0              | -3.149940               | 0.825316  | -0.037554 |
| 15               | 6                | 0              | -2.422007               | 0.919827  | 1.210161  |
| 16               | 6                | 0              | -2.050547               | -0.415535 | 1.602244  |
| 17               | 6                | 0              | -2.521020               | -1.323887 | 0.582638  |
| 18               | 1                | 0              | -3.651979               | -0.942694 | -1.331472 |
| 19               | 1                | 0              | -3.551609               | 1.668022  | -0.606236 |
| 20               | 1                | 0              | -2.225643               | 1.840393  | 1.766044  |
| 21               | 1                | 0              | -1.507558               | -0.696821 | 2.509084  |
| 22               | 1                | 0              | -2.386165               | -2.408379 | 0.571229  |
| 23               | 6                | 0              | 0.254652                | -1.540055 | -0.952059 |
| 24               | 8                | 0              | 0.037091                | -2.691171 | -1.220827 |
| 25               | 6                | 0              | -0.314735               | 1.671541  | -0.828955 |
| 26               | 8                | 0              | 0.004917                | 2.772331  | -1.188391 |

**Complete Gaussian 03 reference  
(Reference 31)**

Frisch, M. J.; Trucks, G. W.; Schlegel, H. B.; Scuseria, G. E.; Robb, M. A.; Cheeseman, J. R.; Montgomery, Jr., J. A.; Vreven, T.; Kudin, K. N.; Burant, J. C.; Millam, J. M.; Iyengar, S. S.; Tomasi, J.; Barone, V.; Mennucci, B.; Cossi, M.; Scalmani, G.; Rega, N.; Petersson, G. A.; Nakatsuji, H.; Hada, M.; Ehara, M.; Toyota, K.; Fukuda, R.; Hasegawa, J.; Ishida, M.; Nakajima, T.; Honda, Y.; Kitao, O.; Nakai, H.; Klene, M.; Li, X.; Knox, J. E.; Hratchian, H. P.; Cross, J. B.; Bakken, V.; Adamo, C.; Jaramillo, J.; Gomperts, R.; Stratmann, R. E.; Yazyev, O.; Austin, A. J.; Cammi, R.; Pomelli, C.; Ochterski, J. W.; Ayala, P. Y.; Morokuma, K.; Voth, G. A.; Salvador, P.; Dannenberg, J. J.; Zakrzewski, V. G.; Dapprich, S.; Daniels, A. D.; Strain, M. C.; Farkas, O.; Malick, D. K.; Rabuck, A. D.; Raghavachari, K.; Foresman, J. B.; Ortiz, J. V.; Cui, Q.; Baboul, A. G.; Clifford, S.; Cioslowski, J.; Stefanov, B. B.; Liu, G.; Liashenko, A.; Piskorz, P.; Komaromi, I.; Martin, R. L.; Fox, D. J.; Keith, T.; Al-Laham, M. A.; Peng, C. Y.; Nanayakkara, A.; Challacombe, M.; Gill, P. M. W.; Johnson, B.; Chen, W.; Wong, M. W.; Gonzalez, C.; and Pople, J. A. Gaussian 03, Revision C.02; Gaussian, Inc., Wallingford CT, **2004**.



## Appendix

Results from density functional theory studies on  $(\eta^5\text{-Me}_5\text{C}_5)_2\text{Cr}_2(\text{CO})_n$   
( $n = 4, 3, 2$ ) derivatives (B3LYP and BP86 methods).

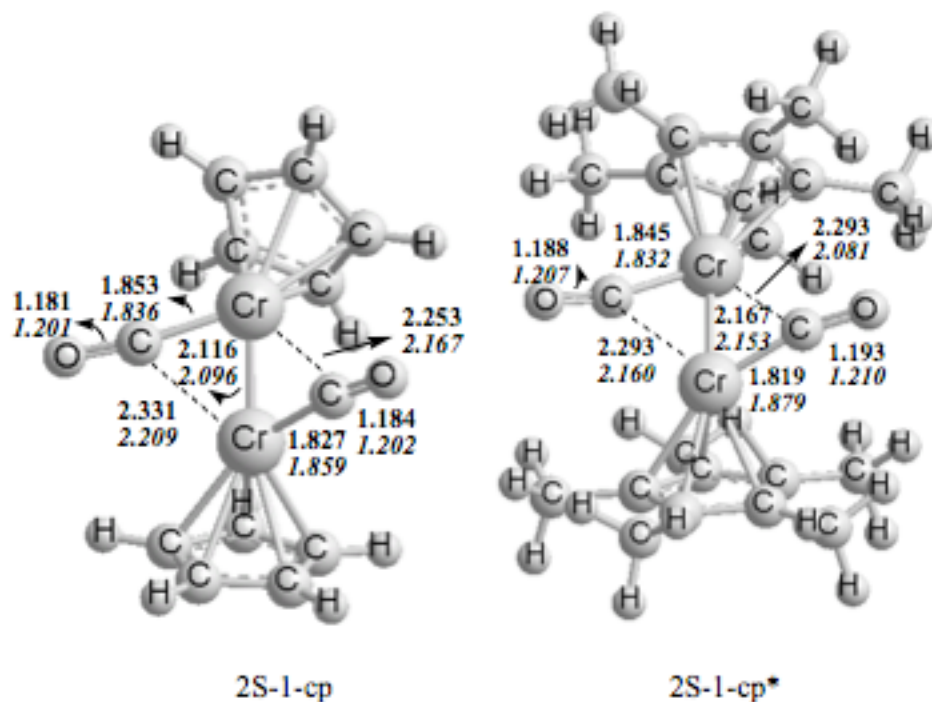

**Figure A1.** Comparison of the structures 2S-1-cp and 2S-1-cp\*.

**Table A1:** The Cr-Cr bond length and the number of imaginary vibrational frequencies (Nimg) for 2S-1-cp and 2S-1-cp\*.

|       |           | 2S-1-cp *(C <sub>s</sub> ) | 2S-1-cp (C <sub>1</sub> ) |
|-------|-----------|----------------------------|---------------------------|
| B3LYP | Cr-Cr (Å) | 2.167                      | 2.116                     |
|       | Nimg      | 0                          | 0                         |
| BP86  | Cr-Cr (Å) | 2.153                      | 2.096                     |
|       | Nimg      | 0                          | 0                         |

**Table A2** Infrared active  $\nu(\text{CO})$  vibrational frequencies ( $\text{cm}^{-1}$ ) predicted for 2S-1-cp and 2S-1-cp\* (infrared intensities in parentheses are in  $\text{km/mol}$ ).

|          |  | BP86                    |
|----------|--|-------------------------|
| 2S-1-cp  |  | 1802 (1040), 1817 (206) |
| 2S-1-cp* |  | 1757(802), 1778(175)    |

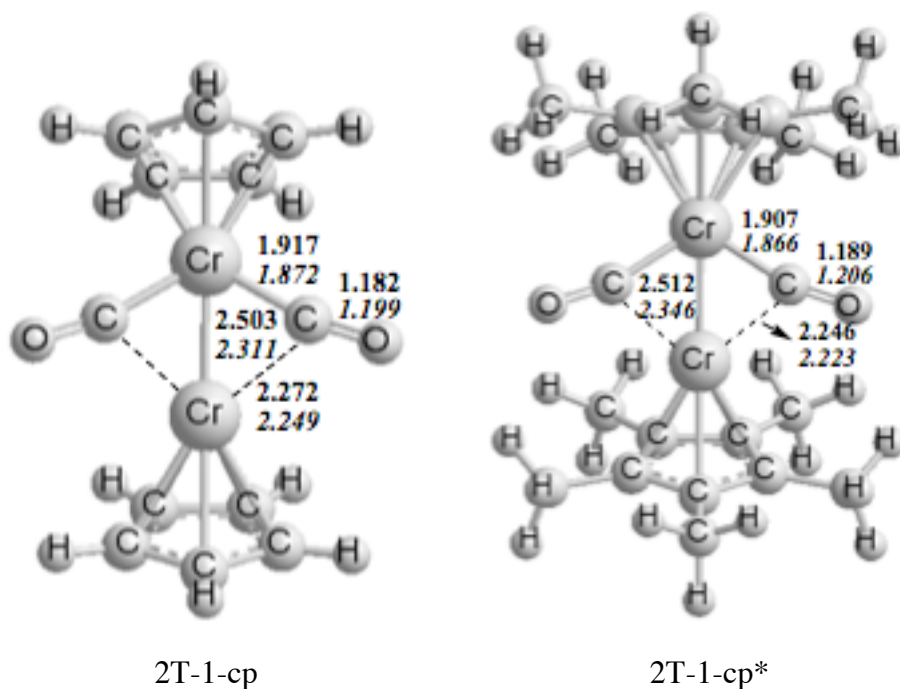

**Figure A2.** The structures of 2T-1-cp and 2T-1-cp\*.

**Table A3.** The Cr-Cr bond length and the number of imaginary vibrational frequencies (Nimg) for 2T-1-cp and 2T-1-cp\*.

|       |           | 2T-1-cp *(C <sub>s</sub> ) | 2T-1-cp (C <sub>s</sub> ) |
|-------|-----------|----------------------------|---------------------------|
| B3LYP | Cr-Cr (Å) | 2.512                      | 2.503                     |
|       | Nimg      | 0                          | 0                         |
| BP86  | Cr-Cr (Å) | 2.346                      | 2.311                     |
|       | Nimg      | 1(13i)                     | 0                         |

**Table A4.** Infrared active  $\nu(\text{CO})$  vibrational frequencies ( $\text{cm}^{-1}$ ) predicted for 2T-1-cp and 2T-1-cp\* (infrared intensities in parentheses are in  $\text{km/mol}$ ).

|          |  | BP86                   |
|----------|--|------------------------|
| 2T-1-cp  |  | 1805 (998), 1838 (257) |
| 2T-1-cp* |  | 1766(839), 1799(183)   |

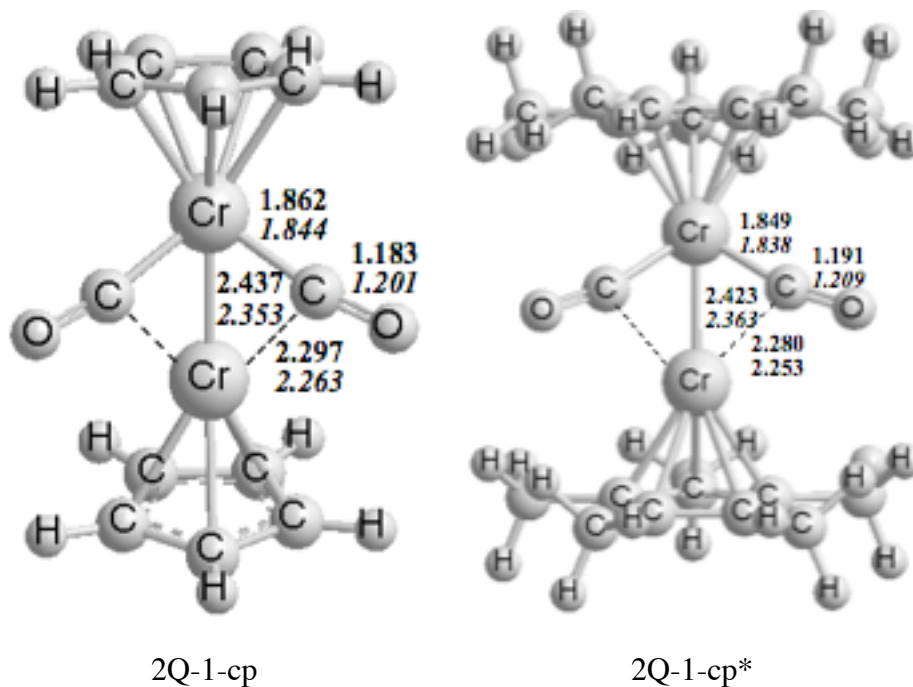

**Figure A3.** The structures of 2Q-1-cp and 2Q-1-cp\*.

**Table A5.** The Cr-Cr bond length and the number of imaginary vibrational frequencies (Nimg) for 2Q-1-cp and 2Q-1-cp\*.

|       |           | 2Q-1-cp *(C <sub>s</sub> )                                              | 2Q-1-cp (C <sub>s</sub> ) |
|-------|-----------|-------------------------------------------------------------------------|---------------------------|
| B3LYP | Cr-Cr (Å) | 2.423                                                                   | 2.437                     |
|       | Nimg      | 1 (7i)                                                                  | 1 (14i)                   |
|       |           | This small imaginary frequency disappears with a finer grid (120, 974). |                           |
| BP86  | Cr-Cr (Å) | 2.363                                                                   | 2.353                     |
|       | Nimg      | 0                                                                       | 1 (17i)                   |

**Table A6.** Infrared active  $\nu(\text{CO})$  vibrational frequencies ( $\text{cm}^{-1}$ ) predicted for 2Q-1-cp and 2Q-1-cp\* (infrared intensities in parentheses are in  $\text{km/mol}$ ).

| BP86     |                        |
|----------|------------------------|
| 2Q-1-cp  | 1797 (865), 1833 (283) |
| 2Q-1-cp* | 1756(12), 1793(12)     |

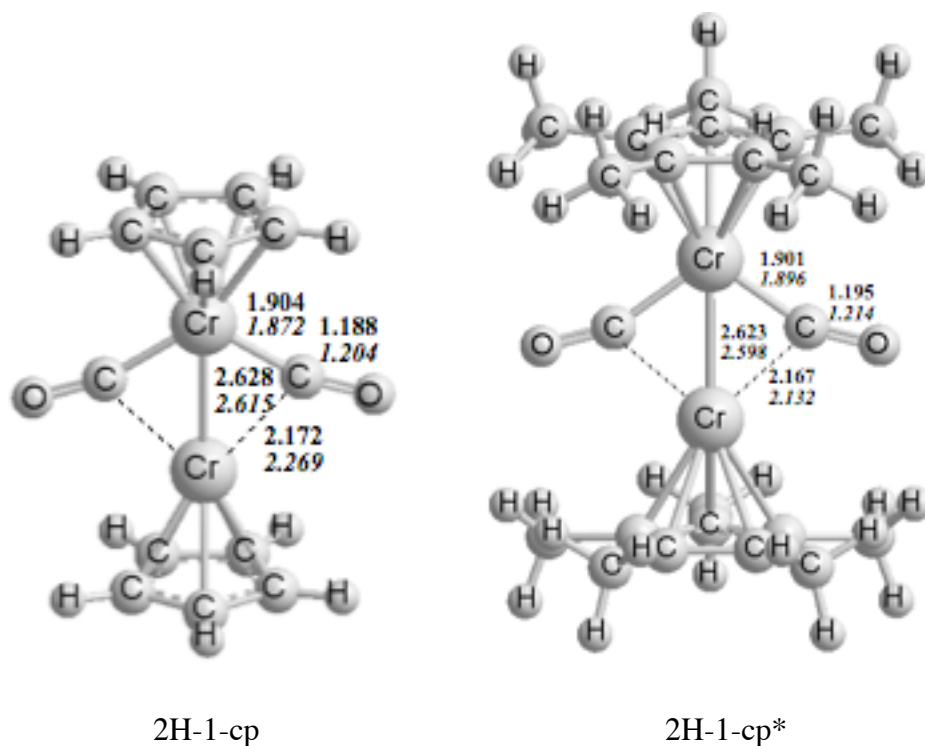

**Figure A4.** The structures of 2H-1-cp and 2H-1-cp\*.

**Table A7.** The Cr-Cr bond length and the number of imaginary vibrational frequencies (Nimg) for 2H-1-cp and 2H-1-cp\*.

|       |           | 2H-1-cp* (C <sub>s</sub> ) | 2H-1-cp (C <sub>s</sub> ) |
|-------|-----------|----------------------------|---------------------------|
| B3LYP | Cr-Cr (Å) | 2.623                      | 2.628                     |
|       | Nimg      | 2(24i,10i)                 | 2(22i,18i)                |
| BP86  | Cr-Cr (Å) | 2.598                      | 2.615                     |
|       | Nimg      | 0                          | 2(44i,26i)                |

**Table A8.** Infrared active  $\nu(\text{CO})$  vibrational frequencies ( $\text{cm}^{-1}$ ) predicted for 2H-1-cp and 2H-1-cp\* (infrared intensities in parentheses are in  $\text{km/mol}$ ).

| BP86     |                       |
|----------|-----------------------|
| 2H-1-cp  | 1723 (2030), 1791 (0) |
| 2H-1-cp* | 1687(1110), 1738(3)   |

**Table A9.** The total energies ( $E$ , in hartree) and relative energies ( $\Delta E$ , in kcal/mol) for the  $\text{Cp}^*_2\text{Cr}_2(\text{CO})_2$  structures. The number of imaginary vibrational frequencies ( $N_{\text{img}}$ ) for each structure is also reported.

|       |                        | 2S-1-cp*<br>( $C_1$ ) | 2T-1-cp*<br>( $C_s$ ) | 2Q-1-cp*<br>( $C_s$ ) | 2H-1-cp*<br>( $C_s$ ) |
|-------|------------------------|-----------------------|-----------------------|-----------------------|-----------------------|
| B3LYP | $E$                    | -3096.02410           | -3096.09806           | -3096.08255           | -3096.08078           |
|       | $\Delta E$             | 36.7                  | -9.7                  | 0.0                   | 1.1                   |
|       | $\langle S^2 \rangle$  | 0.0                   | 3.31                  | 6.52                  | 12.15                 |
|       | Cr-Cr ( $\text{\AA}$ ) | 2.167                 | 2.512                 | 2.423                 | 2.623                 |
|       | $N_{\text{img}}$       | 0                     | 0                     | 1 (7i)                | 2(24i,10i)            |
| BP86  | $E$                    | -3096.38620           | -3096.41206           | -3096.40772           | -3096.39298           |
|       | $\Delta E$             | 13.5                  | -2.7                  | 0.0                   | 9.2                   |
|       | $\langle S^2 \rangle$  | 0.0                   | 4.33                  | 6.16                  | 12.09                 |
|       | Cr-Cr ( $\text{\AA}$ ) | 2.153                 | 2.346                 | 2.363                 | 2.598                 |
|       | $N_{\text{img}}$       | 0                     | 1(13i)                | 0                     | 0                     |

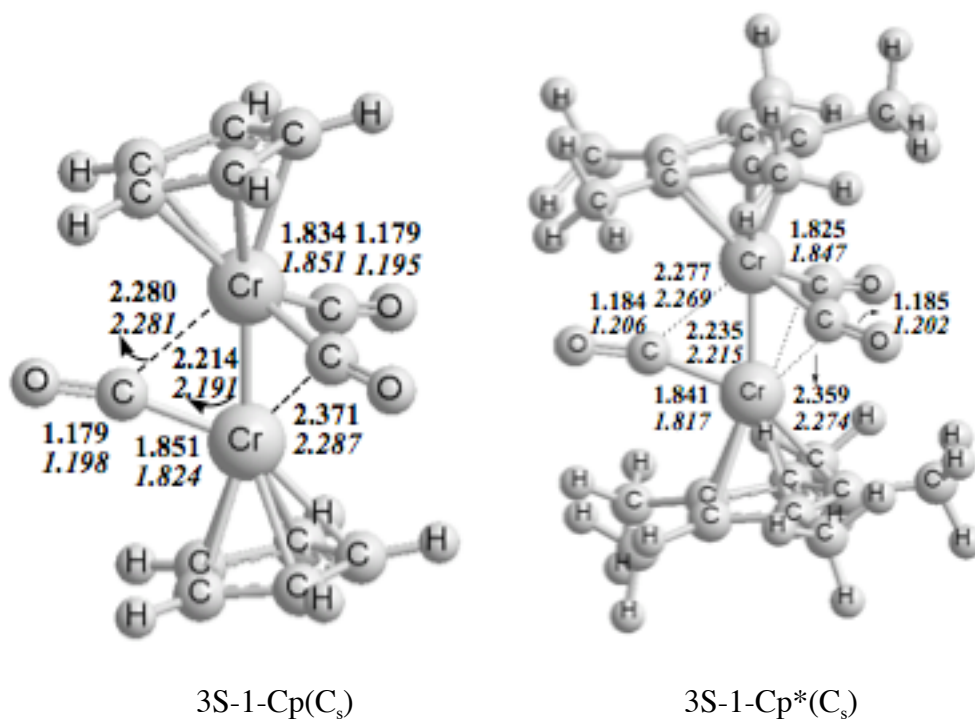

**Figure A5.** The structures of 3S-1 and  $\text{Cp}^*_2\text{Cr}_2(\text{CO})_3$ .

**Table A10.** The Cr-Cr bond length and the number of imaginary vibrational frequencies (Nimg) for 3S-1-Cp and 3S-1-Cp\*.

|       |           | 3S-1-Cp*(C <sub>s</sub> ) | 3S-1-Cp(C <sub>s</sub> ) |
|-------|-----------|---------------------------|--------------------------|
| B3LYP | Cr-Cr (Å) | 2.235                     | 2.214                    |
|       | Nimg      | 0                         | 0                        |
| BP86  | Cr-Cr (Å) | 2.215                     | 2.191                    |
|       | Nimg      | 0                         | 1(30i)                   |

**Table A11.** Infrared active  $\nu(\text{CO})$  vibrational frequencies (cm<sup>-1</sup>) predicted for 3S-1-Cp and 3S-1-Cp\* (infrared intensities in parentheses are in km/mol).

|                          |  | BP86                            |
|--------------------------|--|---------------------------------|
| 3S-1-Cp*                 |  | 1792(733), 1795(545), 1833(188) |
| 3S-1-Cp(C <sub>s</sub> ) |  | 1833(670), 1837(928), 1870(144) |

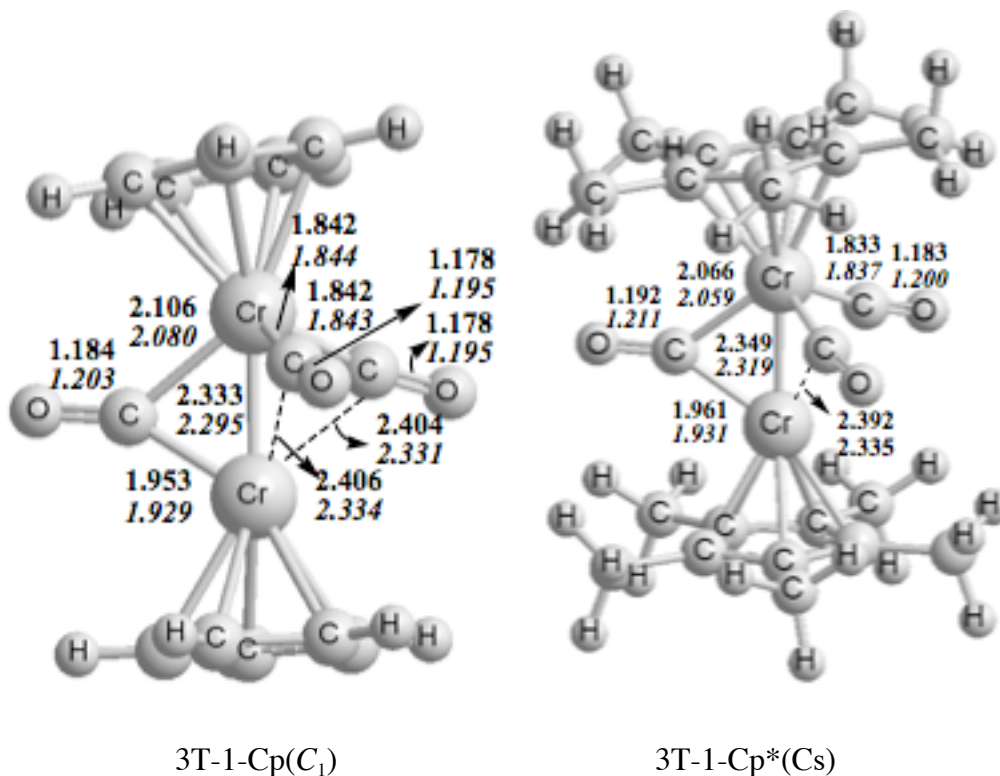

**Figure A6.** The structures of the triplets 3T-1-Cp and 3T-1-Cp\*.

**Table A12.** The Cr-Cr bond lengths and the number of imaginary vibrational frequencies (Nimg) for 3T-1-Cp and the triplet 3T-1-Cp\*

|       |           | 3T-1-Cp*(Cs)                                                          | 3T-1-Cp<br>(C <sub>1</sub> ) |
|-------|-----------|-----------------------------------------------------------------------|------------------------------|
| B3LYP | Cr-Cr (Å) | 2.349                                                                 | 2.333                        |
|       | Nimg      | 2(44i,11i)                                                            | 0                            |
| BP86  | Cr-Cr (Å) | 2.319                                                                 | 2.295                        |
|       | Nimg      | 1(10i)                                                                | 0                            |
|       |           | This small imaginary frequency disappears with a finer grid (120974). |                              |

**Table A13.** Infrared active  $\nu(\text{CO})$  vibrational frequencies ( $\text{cm}^{-1}$ ) predicted for the 3T-1-Cp and the triplet 3T-1-Cp\* (infrared intensities in parentheses are in  $\text{km/mol}$ ).

|                        |  | BP86                            |
|------------------------|--|---------------------------------|
| 3T-1-Cp* (triplet, Cs) |  | 1747(639), 1801(657), 1842(205) |
| 3T-1 (C <sub>1</sub> ) |  | 1796(775), 1831(789), 1872(211) |

**Table A14.** The total energies (E, in hartree) and relative energies ( $\Delta E$ , in  $\text{kcal/mol}$ ) for the  $\text{Cp}^*_2\text{Cr}_2(\text{CO})_3$  structures. The number of imaginary vibrational frequencies (Nimg) for each structure is also reported.

|       |                       | 3S-1-Cp*                                                               | 3T-1-Cp*    |
|-------|-----------------------|------------------------------------------------------------------------|-------------|
| B3LYP | E                     | -3209.44350                                                            | -3209.47802 |
|       | $\Delta E$            | 21.7                                                                   | 0.0         |
|       | $\langle S^2 \rangle$ | 0.00                                                                   | 2.36        |
|       | Cr-Cr (Å)             | 2.235                                                                  | 2.349       |
|       | Nimg                  | 0                                                                      | 2(44i,11i)  |
| BP86  | E                     | -3209.81066                                                            | -3209.82934 |
|       | $\Delta E$            | 11.7                                                                   | 0.0         |
|       | $\langle S^2 \rangle$ | 0.00                                                                   | 2.11        |
|       | Cr-Cr (Å)             | 2.215                                                                  | 2.319       |
|       | Nimg                  | 0                                                                      | 1(10i)      |
|       |                       | This small imaginary frequency disappears with a finer grid (120,974). |             |

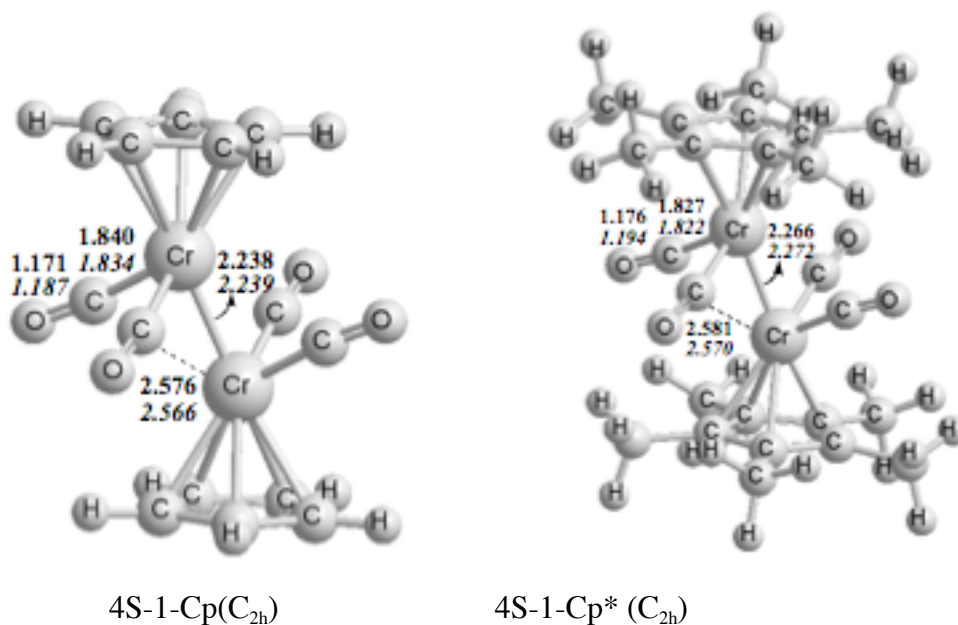

**Figure A7.** The structures of 4S-1-Cp and the triplet 4S-1-Cp\*.

**Table A15.** Infrared active  $\nu(\text{CO})$  vibrational frequencies ( $\text{cm}^{-1}$ ) predicted for the 4S-1-Cp and the triplet 4S-1-Cp\* (infrared intensities in parentheses are in  $\text{km/mol}$ ).

| BP86                  |                                              |
|-----------------------|----------------------------------------------|
| 4S-1-Cp ( $C_{2h}$ )  | 1876 (0), 1890 (1332), 1904 (1146), 1940 (0) |
| 4S-1-Cp* ( $C_{2h}$ ) | 1838(0), 1852 (1109), 1869 (950), 1903 (0)   |
